# Supplementary material
Source: MDPI journal article supplement (https://www.mdpi.com/2227-9717/10/2/254)
Supplement: s1 [file s1]

# Supplementary data

**Table S1.** Measured outflow (Q) and the calculated average outflow ( $Q_{av}$ ).

| P <sub>I</sub> (Psi)                | P <sub>I</sub>        | P <sub>B</sub>        | ΔP                    | Q                      |        |        |        | Q <sub>av</sub>        |        |        |        |
|-------------------------------------|-----------------------|-----------------------|-----------------------|------------------------|--------|--------|--------|------------------------|--------|--------|--------|
|                                     | (×10 <sup>4</sup> Pa) | (×10 <sup>4</sup> Pa) | (×10 <sup>4</sup> Pa) | (cm <sup>3</sup> /min) |        |        |        | (cm <sup>3</sup> /min) |        |        |        |
| Compressed powder tablet at 60 MPa  |                       |                       |                       |                        |        |        |        |                        |        |        |        |
| 5                                   | 3.45                  | 9.88                  | 3.10                  | 55.96                  | 57.58  | 62.77  | 57.91  | 46.95                  | 48.31  | 52.66  | 48.59  |
| 10                                  | 6.89                  | 9.88                  | 6.46                  | 134.38                 | 135.57 | 135.48 | 135.02 | 98.02                  | 98.88  | 98.81  | 98.48  |
| 15                                  | 10.3                  | 9.88                  | 9.91                  | 222.44                 | 227.94 | 230.04 | 223.18 | 143.93                 | 147.49 | 148.85 | 144.41 |
| Compressed powder tablet at 80 MPa  |                       |                       |                       |                        |        |        |        |                        |        |        |        |
| 5                                   | 3.45                  | 9.88                  | 3.10                  | 9.21                   | 8.96   | 9.14   | 9.10   | 7.73                   | 7.52   | 7.67   | 7.64   |
| 10                                  | 6.89                  | 9.88                  | 6.46                  | 18.90                  | 19.02  | 19.02  | 18.83  | 13.79                  | 13.87  | 13.87  | 13.73  |
| 15                                  | 10.30                 | 9.88                  | 9.91                  | 31.04                  | 30.88  | 31.12  | 30.96  | 20.09                  | 19.98  | 20.14  | 20.03  |
| 20                                  | 13.80                 | 9.88                  | 13.20                 | 45.43                  | 44.99  | 44.52  | 44.85  | 26.33                  | 26.07  | 25.80  | 25.99  |
| 25                                  | 17.20                 | 9.88                  | 16.70                 | 59.46                  | 61.48  | 59.35  | 57.97  | 31.29                  | 32.35  | 31.23  | 30.51  |
| 30                                  | 20.71                 | 9.88                  | 20.10                 | 75.61                  | 76.09  | 75.51  | 77.77  | 36.42                  | 36.65  | 36.38  | 37.46  |
| 35                                  | 24.10                 | 9.88                  | 23.5                  | 92.12                  | 94.60  | 93.86  | 89.64  | 40.87                  | 41.97  | 41.64  | 39.77  |
| Compressed powder tablet at 100 MPa |                       |                       |                       |                        |        |        |        |                        |        |        |        |
| 5                                   | 3.45                  | 9.88                  | 3.10                  | 6.49                   | 6.76   | 7.08   | 6.53   | 5.44                   | 5.67   | 5.94   | 5.48   |
| 10                                  | 6.89                  | 9.88                  | 6.46                  | 20.92                  | 22.14  | 21.77  | 21.93  | 15.26                  | 16.15  | 15.88  | 15.99  |
| 15                                  | 10.30                 | 9.88                  | 9.91                  | 33.75                  | 33.42  | 34.28  | 33.60  | 21.84                  | 21.62  | 22.18  | 21.74  |
| 20                                  | 13.80                 | 9.88                  | 13.20                 | 46.85                  | 46.74  | 46.03  | 46.60  | 27.15                  | 27.09  | 26.67  | 27.00  |
| 25                                  | 17.20                 | 9.88                  | 16.70                 | 63.50                  | 63.16  | 63.43  | 63.43  | 33.42                  | 33.24  | 33.38  | 33.38  |
| 30                                  | 20.71                 | 9.88                  | 20.10                 | 78.07                  | 77.77  | 77.67  | 81.14  | 37.61                  | 37.46  | 37.41  | 39.09  |
| 35                                  | 24.10                 | 9.88                  | 23.5                  | 98.49                  | 98.16  | 97.37  | 96.89  | 43.70                  | 43.56  | 43.20  | 42.99  |
| Compressed powder tablet at 120 MPa |                       |                       |                       |                        |        |        |        |                        |        |        |        |
| 5                                   | 3.45                  | 9.88                  | 3.10                  | 2.47                   | 2.49   | 2.48   | 2.46   | 2.07                   | 2.09   | 2.08   | 2.07   |
| 10                                  | 6.89                  | 9.88                  | 6.46                  | 5.84                   | 5.86   | 5.72   | 5.90   | 4.26                   | 4.27   | 4.17   | 4.31   |
| 15                                  | 10.30                 | 9.88                  | 9.91                  | 9.25                   | 9.70   | 9.36   | 9.64   | 5.99                   | 6.28   | 6.05   | 6.24   |
| 20                                  | 13.80                 | 9.88                  | 13.20                 | 13.28                  | 13.61  | 13.40  | 13.80  | 7.69                   | 7.89   | 7.76   | 7.99   |
| 25                                  | 17.20                 | 9.88                  | 16.70                 | 17.31                  | 17.77  | 17.66  | 18.31  | 9.11                   | 9.35   | 9.30   | 9.64   |
| 30                                  | 20.71                 | 9.88                  | 20.10                 | 22.51                  | 22.60  | 22.85  | 22.77  | 10.84                  | 10.89  | 11.01  | 10.97  |
| 35                                  | 24.10                 | 9.88                  | 23.5                  | 28.79                  | 28.97  | 29.05  | 29.53  | 12.77                  | 12.85  | 12.89  | 13.10  |
| Compressed powder tablet at 140 MPa |                       |                       |                       |                        |        |        |        |                        |        |        |        |
| 5                                   | 3.45                  | 9.88                  | 3.10                  | 1.08                   | 1.22   | 1.17   | 1.12   | 0.90                   | 1.02   | 0.98   | 0.94   |
| 10                                  | 6.89                  | 9.88                  | 6.46                  | 3.98                   | 3.97   | 4.20   | 4.24   | 2.90                   | 2.90   | 3.06   | 3.10   |
| 15                                  | 10.30                 | 9.88                  | 9.91                  | 6.84                   | 7.37   | 7.35   | 7.08   | 4.43                   | 4.77   | 4.75   | 4.58   |
| 20                                  | 13.80                 | 9.88                  | 13.20                 | 9.75                   | 10.05  | 10.29  | 10.01  | 5.65                   | 5.82   | 5.96   | 5.80   |
| 25                                  | 17.20                 | 9.88                  | 16.70                 | 12.12                  | 13.46  | 13.70  | 13.77  | 6.38                   | 7.08   | 7.21   | 7.24   |
| 30                                  | 20.71                 | 9.88                  | 20.10                 | 15.08                  | 18.31  | 15.76  | 17.41  | 7.27                   | 8.82   | 7.59   | 8.39   |
| 35                                  | 24.10                 | 9.88                  | 23.5                  | 26.53                  | 26.94  | 25.98  | 26.44  | 11.77                  | 11.95  | 11.53  | 11.73  |
| Compressed powder tablet at 160 MPa |                       |                       |                       |                        |        |        |        |                        |        |        |        |
| 5                                   | 3.45                  | 9.88                  | 3.10                  | 1.19                   | 1.24   | 1.19   | 1.17   | 1.00                   | 1.04   | 1.00   | 0.98   |
| 10                                  | 6.89                  | 9.88                  | 6.46                  | 2.67                   | 2.72   | 2.68   | 2.78   | 1.95                   | 1.98   | 1.95   | 2.03   |
| 15                                  | 10.30                 | 9.88                  | 9.91                  | 4.36                   | 4.28   | 4.39   | 4.35   | 2.82                   | 2.77   | 2.84   | 2.82   |
| 20                                  | 13.80                 | 9.88                  | 13.20                 | 6.17                   | 6.12   | 6.14   | 6.11   | 3.58                   | 3.55   | 3.56   | 3.54   |
| 25                                  | 17.20                 | 9.88                  | 16.70                 | 8.14                   | 8.12   | 8.07   | 8.05   | 4.28                   | 4.28   | 4.25   | 4.24   |
| 30                                  | 20.71                 | 9.88                  | 20.10                 | 10.27                  | 10.49  | 10.24  | 11.01  | 4.95                   | 5.05   | 4.93   | 5.30   |
| 35                                  | 24.10                 | 9.88                  | 23.5                  | 12.63                  | 12.61  | 12.61  | 12.93  | 5.61                   | 5.59   | 5.59   | 5.74   |

| Compressed powder tablet at 180 MPa         |       |      |       |       |       |       |       |      |      |      |      |
|---------------------------------------------|-------|------|-------|-------|-------|-------|-------|------|------|------|------|
| 5                                           | 3.45  | 9.88 | 3.10  | 1.19  | 1.18  | 1.18  | 1.19  | 1.00 | 0.99 | 0.99 | 1.00 |
| 10                                          | 6.89  | 9.88 | 6.46  | 2.43  | 2.43  | 2.44  | 2.44  | 1.77 | 1.77 | 1.78 | 1.78 |
| 15                                          | 10.30 | 9.88 | 9.91  | 4.24  | 4.18  | 4.20  | 4.51  | 2.74 | 2.70 | 2.72 | 2.92 |
| 20                                          | 13.80 | 9.88 | 13.20 | 5.92  | 5.91  | 5.89  | 5.91  | 3.43 | 3.43 | 3.42 | 3.42 |
| 25                                          | 17.20 | 9.88 | 16.70 | 8.27  | 9.37  | 9.50  | 9.37  | 4.35 | 4.93 | 5.00 | 4.93 |
| 30                                          | 20.71 | 9.88 | 20.10 | 11.77 | 11.79 | 11.82 | 11.78 | 5.67 | 5.68 | 5.69 | 5.68 |
| 35                                          | 24.10 | 9.88 | 23.5  | 14.96 | 14.87 | 14.69 | 14.62 | 6.64 | 6.60 | 6.52 | 6.49 |
| Compressed powder tablet at 200 MPa         |       |      |       |       |       |       |       |      |      |      |      |
| 5                                           | 3.45  | 9.88 | 3.10  | 0.88  | 0.89  | 0.91  | 0.88  | 0.74 | 0.75 | 0.76 | 0.74 |
| 10                                          | 6.89  | 9.88 | 6.46  | 2.56  | 2.54  | 2.55  | 2.55  | 1.87 | 1.85 | 1.86 | 1.86 |
| 15                                          | 10.30 | 9.88 | 9.91  | 4.16  | 4.16  | 4.19  | 4.16  | 2.69 | 2.69 | 2.71 | 2.69 |
| 20                                          | 13.80 | 9.88 | 13.20 | 6.30  | 6.30  | 6.24  | 6.17  | 3.65 | 3.65 | 3.61 | 3.58 |
| 25                                          | 17.20 | 9.88 | 16.70 | 8.20  | 8.32  | 8.43  | 8.32  | 4.32 | 4.38 | 4.44 | 4.38 |
| 30                                          | 20.71 | 9.88 | 20.10 | 10.51 | 10.69 | 10.69 | 10.69 | 5.06 | 5.15 | 5.15 | 5.15 |
| 35                                          | 24.10 | 9.88 | 23.50 | 13.61 | 13.93 | 13.61 | 13.61 | 6.04 | 6.18 | 6.04 | 6.04 |
| PI: inlet pressure, PB: barometric pressure |       |      |       |       |       |       |       |      |      |      |      |

**Table S2.** Calculated Darcy permeability for each compressed powder tablet relative density.

| $Q_{avmoy}$<br>( $\times 10^{-7} \text{ m}^3/\text{s}$ ) | L<br>( $\times 10^{-3} \text{ m}$ ) | R<br>( $\times 10^{-2} \text{ m}$ ) | A<br>( $\times 10^{-4} \text{ m}^2$ ) | $\mu$<br>( $\times 10^{-5} \text{ Pa}\cdot\text{s}$ ) | $\Delta P$<br>( $\times 10^4 \text{ Pa}$ ) | $K_p$<br>( $\times 10^{-3} \text{ Darcy}$ ) | $K_p$<br>( $\times 10^{-15} \text{ m}^2$ ) |
|----------------------------------------------------------|-------------------------------------|-------------------------------------|---------------------------------------|-------------------------------------------------------|--------------------------------------------|---------------------------------------------|--------------------------------------------|
| Compressed powder tablet at 60 MPa                       |                                     |                                     |                                       |                                                       |                                            |                                             |                                            |
| 8.20 (0.31)                                              |                                     |                                     |                                       |                                                       | 3.10                                       | 10.10 (0.04)                                | 10.11 (0.04)                               |
| 16.5 (0.04)                                              | 9.31 (0.40)                         | 1.25 (0.04)                         | 4.91 (0.42)                           | 1.99                                                  | 6.46                                       | 9.74 (0.03)                                 | 9.74 (0.03)                                |
| 24.4 (0.03)                                              |                                     |                                     |                                       |                                                       | 9.91                                       | 9.42 (0.11)                                 | 9.42 (0.11)                                |
| Compressed powder tablet at 80 MPa                       |                                     |                                     |                                       |                                                       |                                            |                                             |                                            |
| 1.28 (0.01)                                              |                                     |                                     |                                       |                                                       | 3.10                                       | 1.51 (0.02)                                 | 1.51 (0.02)                                |
| 2.31 (0.01)                                              |                                     |                                     |                                       |                                                       | 6.46                                       | 1.32 (0.01)                                 | 1.32 (0.01)                                |
| 3.35 (0.01)                                              |                                     |                                     |                                       |                                                       | 9.91                                       | 1.25 (0.01)                                 | 1.25 (0.01)                                |
| 4.34 (0.04)                                              | 9.31 (0.40)                         | 1.25 (0.04)                         | 4.91 (0.42)                           | 1.99                                                  | 13.2                                       | 1.21 (0.01)                                 | 1.21 (0.01)                                |
| 5.23 (0.1)                                               |                                     |                                     |                                       |                                                       | 16.7                                       | 1.16 (0.03)                                 | 1.16 (0.03)                                |
| 6.13 (0.1)                                               |                                     |                                     |                                       |                                                       | 20.1                                       | 1.12 (0.01)                                 | 1.12 (0.01)                                |
| 6.64 (0.1)                                               |                                     |                                     |                                       |                                                       | 23.5                                       | 1.07 (0.03)                                 | 1.07 (0.03)                                |
| Compressed powder tablet at 100 MPa                      |                                     |                                     |                                       |                                                       |                                            |                                             |                                            |
| 0.94 (0.30)                                              |                                     |                                     |                                       |                                                       | 3.10                                       | 1.08 (0.03)                                 | 1.08 (0.03)                                |
| 2.64 (0.04)                                              |                                     |                                     |                                       |                                                       | 6.46                                       | 1.45 (0.03)                                 | 1.45 (0.03)                                |
| 3.65 (0.03)                                              |                                     |                                     |                                       |                                                       | 9.91                                       | 1.31 (0.01)                                 | 1.31 (0.01)                                |
| 4.51 (0.03)                                              | 8.63 (0.31)                         | 1.25 (0.04)                         | 4.91 (0.42)                           | 1.99                                                  | 13.2                                       | 1.21 (0.01)                                 | 1.21 (0.01)                                |
| 5.57 (0.01)                                              |                                     |                                     |                                       |                                                       | 16.7                                       | 1.18 (0.00)                                 | 1.18 (0.00)                                |
| 6.33 (0.10)                                              |                                     |                                     |                                       |                                                       | 20.1                                       | 1.12 (0.01)                                 | 1.12 (0.01)                                |
| 7.24 (0.04)                                              |                                     |                                     |                                       |                                                       | 23.5                                       | 1.09 (0.01)                                 | 1.09 (0.01)                                |
| Compressed powder tablet at 120 MPa                      |                                     |                                     |                                       |                                                       |                                            |                                             |                                            |
| 0.35 (0.02)                                              |                                     |                                     |                                       |                                                       | 3.10                                       | 0.39 (0.02)                                 | 0.39 (0.02)                                |
| 0.71 (0.10)                                              | 8.63 (0.31)                         | 1.25 (0.04)                         | 4.91 (0.42)                           | 1.99                                                  | 6.46                                       | 0.38 (0.05)                                 | 0.38 (0.05)                                |
| 1.03 (0.02)                                              |                                     |                                     |                                       |                                                       | 9.91                                       | 0.36 (0.08)                                 | 0.36 (0.08)                                |

|                                     |             |             |             |      |       |             |              |
|-------------------------------------|-------------|-------------|-------------|------|-------|-------------|--------------|
| 1.31 (0.02)                         |             |             |             |      | 13.2  | 0.34 (0.06) | 0.34 (0.06)  |
| 1.56 (0.04)                         |             |             |             |      | 16.7  | 0.32 (0.08) | 0.32 (0.08)  |
| 1.82 (0.01)                         |             |             |             |      | 20.1  | 0.31 (0.02) | 0.31 (0.02)  |
| 2.16 (0.02)                         |             |             |             |      | 23.5  | 0.32 (0.03) | 0.32 (0.03)  |
| Compressed powder tablet at 140 MPa |             |             |             |      |       |             |              |
| 0.16 (0.05)                         |             |             |             |      | 3.10  | 0.17 (0.07) | 0.17 (0.07)) |
| 0.50 (0.12)                         |             |             |             |      | 6.46  | 0.26 (0.05) | 0.26 (0.05)  |
| 0.77 (0.13)                         |             |             |             |      | 9.91  | 0.26 (0.05) | 0.26 (0.05)  |
| 0.97 (0.13)                         | 8.06 (0.31) | 1.25 (0.04) | 4.91 (0.42) | 1.99 | 13.2  | 0.24 (0.04) | 0.24 (0.04)  |
| 1.17 (0.04)                         |             |             |             |      | 16.7  | 0.23 (0.09) | 0.23 (0.09)  |
| 1.34 (0.08)                         |             |             |             |      | 20.10 | 0.22 (0.13) | 0.22 (0.13)  |
| 1.96 (0.01)                         |             |             |             |      | 23.5  | 0.28 (0.03) | 0.28 (0.03)  |
| Compressed powder tablet at 160 MPa |             |             |             |      |       |             |              |
| 0.17 (0.04)                         |             |             |             |      | 3.10  | 0.18 (0.04) | 0.18 (0.04)  |
| 0.33 (0.06)                         |             |             |             |      | 6.46  | 0.17 (0.03) | 0.17 (0.03)  |
| 0.47 (0.05)                         |             |             |             |      | 9.91  | 0.15 (0.02) | 0.15 (0.02)  |
| 0.59 (0.03)                         | 8.06 (0.31) | 1.25 (0.04) | 4.91 (0.42) | 1.99 | 13.2  | 0.15 (0.01) | 0.15 (0.01)  |
| 0.71 (0.04)                         |             |             |             |      | 16.7  | 0.14 (0.01) | 0.14 (0.01)  |
| 0.85 (0.30)                         |             |             |             |      | 20.10 | 0.14 (0.05) | 0.14 (0.05)  |
| 0.94 (0.12)                         |             |             |             |      | 23.5  | 0.13 (0.02) | 0.13 (0.02)  |
| Compressed powder tablet at 180 MPa |             |             |             |      |       |             |              |
| 0.17 (0.01)                         |             |             |             |      | 3.10  | 0.17 (0.01) | 0.17 (0.01)  |
| 0.30 (0.01)                         |             |             |             |      | 6.46  | 0.15 (0.01) | 0.15 (0.01)  |
| 0.46 (0.2)                          |             |             |             |      | 9.91  | 0.15 (0.05) | 0.15 (0.05)  |
| 0.57 (0.01)                         | 8.06 (0.31) | 1.25 (0.04) | 4.91 (0.42) | 1.99 | 13.2  | 0.14 (0.01) | 0.14 (0.01)  |
| 0.80 (0.10)                         |             |             |             |      | 16.7  | 0.16 (0.09) | 0.16 (0.09)  |
| 0.95 (0.02)                         |             |             |             |      | 20.10 | 0.15 (0.01) | 0.15 (0.01)  |
| 1.10 (0.01)                         |             |             |             |      | 23.5  | 0.10 (0.01) | 0.10 (0.01)  |
| Compressed powder tablet at 200 MPa |             |             |             |      |       |             |              |
| 0.125 (0.01)                        |             |             |             |      | 3.10  | 0.13 (0.01) | 0.13 (0.01)  |
| 0.31 (0.01)                         |             |             |             |      | 6.46  | 0.15 (0.00) | 0.15 (0.00)  |
| 0.45 (0.01)                         |             |             |             |      | 9.91  | 0.14 (0.00) | 0.14 (0.00)  |
| 0.60 (0.04)                         | 7.64 (0.42) | 1.25 (0.04) | 4.91 (0.42) | 1.99 | 13.20 | 0.14 (0.01) | 0.14 (0.01)  |
| 0.73 (0.05)                         |             |             |             |      | 16.70 | 0.14 (0.01) | 0.14 (0.01)  |
| 0.86 (0.05)                         |             |             |             |      | 20.10 | 0.13 (0.01) | 0.13 (0.01)  |
| 1.01 (0.01)                         |             |             |             |      | 23.5  | 0.14 (0.01) | 0.14 (0.01)  |

Error at 68.2% of confidence interval (in brackets).
